# Supplementary material for: Challenges of a simplified opt-out consent process in a neonatal randomised controlled trial: qualitative study of parents’ and health professionals’ views and experiences
Source: PubMed Central journal article supplement (PMC8070626; doi:10.1136/archdischild-2020-319545), 2020-11-02
Supplement: archdischild-2020-319545supp001.pdf [file archdischild-2020-319545supp001.pdf]

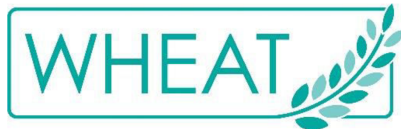

## WHEAT Topic guide for health professionals

### Qualitative Study

- **Purpose of research** – identifying what works and what are obstacles to recruitment/ consent to randomisation, and identifying health professionals' views on using a simplified approach to consent.
- **Background** – professional role, level of experience, training for WHEAT, previous experience of clinical trials.
- **Experience of inviting parents to take part in WHEAT**
  - Overall
  - How do you explain the trial to parents? (Could you explain it to me?) (Prompt: benefits/ risks, randomisation)
  - When do you typically initially discuss the WHEAT trial with parents (on the first update in NICU/after a few days/dependent on baby's condition/when blood transfusion is needed)?
  - Do you tailor the information for individual parents? (if so, how – consideration of type of hospital unit)
  - What questions do parents ask?
  - How do parents react to the timing of the invitation?
  - Are you normally involved in the care of the baby anyway, irrespective of the trial (i.e. is there some existing relationship with parents)?
  - Do you see any patterns in who consents/ doesn't consent?
  - What factors do you think affect parents' willingness to participate?
  - In what ways is this similar or different to other trials? (Prompts: 'opt out', timing, etc)
- **Thoughts on 'opt out' process**
  - Ethical? Practical?
  - How do parents feel about this approach? What about compared to a more usual approach (with a signed form and "opt-in").
- **Thoughts on improving recruitment**
  - Do you have any suggestions for improving the language we use to describe WHEAT to parents?
  - Is there anything else we should do differently?

*This work is supported by the Medical Research Council (MR/N008405/1)*

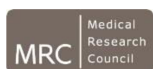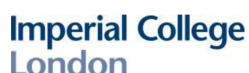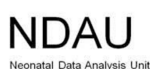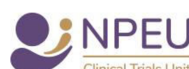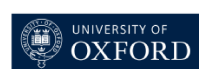

Experience of Participating in the Wheat Trial: Health professionals Topic Guide  
Ancillary study to WHEAT

V1.0 23-May-2019

IRAS ID: 154432

REC Reference: 148/LO/0900

ISRCTN: 62501859
