# Supplementary material for: Challenges of a simplified opt-out consent process in a neonatal randomised controlled trial: qualitative study of parents’ and health professionals’ views and experiences
Source: PubMed Central journal article supplement (PMC8070626; doi:10.1136/archdischild-2020-319545), 2020-11-02
Supplement: archdischild-2020-319545supp002.pdf [file archdischild-2020-319545supp002.pdf]

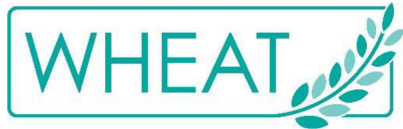

## WHEAT Topic guide for parents

### Qualitative Study

***NB clearly some parents may have little recollection of this, especially if their baby has needed lots of interventions. The topic guide will be used very flexibly according to the situation.***

- **Purpose of research** – understanding how parents make decisions about whether to allow their baby to take part in a clinical trial > aim is to improve the process *and* make sure parents have a better experience of being invited to take part in research when their baby is on NICU
- **Background** – age, ethnicity, occupation, partner, time on NICU, baby (gestation at birth, current age, current health), previous experience of clinical trials
- **Experience of being invited to take part in WHEAT**
  - Overall
  - How was WHEAT explained to you? (Prompt: benefits/ risks, randomisation, standard care, opt out)
  - What did you think of the information? (verbal, Patient Information Sheet) (Prompt: easy to understand? Scary?)
  - Did you have any concerns or questions, and how were they dealt with?
  - Can you tell me about what made you decide to let your baby take part?
  - [If with partner] Was the decision made together or by one of you?
  - Who explained WHEAT to you? Were they already involved in your baby's care? Did that make a difference?
  - What did you feel about the timing of the invitation? (& did you have enough time to decide?)
  - What did you feel about the 'opt out' process? (Prompt: how did you understand this?)
  - What impact did being invited to take part in WHEAT have on you?
- **Thoughts on clinical trials in general**
  - What did you know about clinical trials before you were approached?
  - Have you been approached about any clinical trials? (Prompt: did being approached for the WHEAT trial feel similar/different to any other clinical trials)
  - What do you think about randomising people/babies to different treatments in medical research?

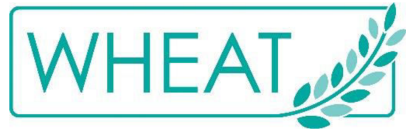

## WHEAT Topic guide for parents

### Qualitative Study

- **Thoughts on improving language & process**
  - Do you have any suggestions for improving the language we use to describe WHEAT to parents? [Prompt: specific words/phrases from Patient Information Sheet]
  - Is there anything else we should do differently?

The topic guide is for internal use only and will not be shown to the parents participating.

*This work is supported by the Medical Research Council (MR/N008405/1)*

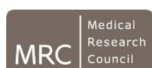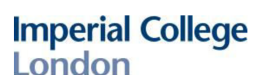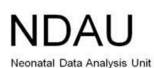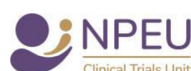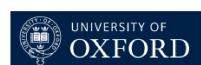

Experience of Participating in the Wheat Trial: Parents Topic Guide  
Ancillary study to WHEAT

V2.0 24 July-2019

IRAS ID: 154432

REC Reference: 148/LO/0900

ISRCTN: 62501859
